# Supplementary material for: Aluminium nanoparticles synthesized by a novel wet chemical method and used to enhance the performance of polymer solar cells by the plasmonic effect
Source: Royal Society of Chemistry journal article supplement (doi:10.1039/c5tc00213c), 2015-01-01
Supplement: c5tc00213c1.pdf [file c5tc00213c1.pdf]

## Electronic Supplementary Information

### Aluminium Nanoparticles Synthesized by a Novel Wet Chemical Method and Used to Enhance the Performance of Polymer Solar Cells by Plasmonic Effect

Yue Cui,<sup>a,b,c</sup> Di Huang,<sup>a,b,†</sup> Yang Li,<sup>a,b</sup> Wenxiao Huang,<sup>c</sup> Zhiqin Liang<sup>a,b</sup>, Zheng Xu<sup>a,b</sup>, Suling

Zhao<sup>a,b,\*</sup>

<sup>a</sup> Key Laboratory of Luminescence and Optical Information, Beijing Jiaotong University, Ministry of Education, Beijing 100044, PR. China

<sup>b</sup> Institute of Optoelectronic Technology, Beijing Jiaotong University, Beijing 100044, PR. China

<sup>c</sup> Center for Nanotechnology and Molecular Materials, Department of Physics, Wake Forest University, Winston-Salem, NC, USA

#### Result and discussion

In order to confirm shell elements around surface, the Fourier transform infrared (FT-IR) spectrum of the prepared Al@PPh<sub>3</sub> NPs were measured. Testing results and structure schematic of PPh<sub>3</sub> are shown in Fig. S1.

(1) C-H vibration of ring hydrogens (marked with triangle)

The peaks at 3066cm<sup>-1</sup> and 3001cm<sup>-1</sup> are antisymmetrical and symmetrical stretching vibration modes  $\nu_{\text{antisym}}$  and  $\nu_{\text{sym}}$  of C-H stretching.

The peaks at 1178cm<sup>-1</sup> and 742cm<sup>-1</sup> in fingerprint region are associated with ring deformation vibration  $\tau$  of the ring C-H wagging.

(2) C-H characteristic pattern (marked with a block)

The weaker peaks between 2000cm<sup>-1</sup> and 1660cm<sup>-1</sup> are overtone and combination bands of C-H deformation vibrations  $\delta$ , which are the characteristic pattern for monosubstituted benzene.

(3) Benzene ring vibration (marked the stars)

A resonance at 1581cm<sup>-1</sup> is attributed to C-C stretching vibration  $\nu_{\text{sym}}$ , while 1475cm<sup>-1</sup> and 1435cm<sup>-1</sup> are stretching vibration  $\nu_{\text{antisym}}$  for monosubstituted benzene ring. The peaks at 916cm<sup>-1</sup>, 852cm<sup>-1</sup> and 692 cm<sup>-1</sup> are deformation vibration  $\omega$  of ring.

(4) Phosphorus bond vibration (marked with ring)

Of most interests are strong and medium-intensity bands observed at 1079cm<sup>-1</sup>, 981cm<sup>-1</sup> and 492cm<sup>-1</sup> respectively. The bands connect phosphorus and Ph- should appear at 1110cm<sup>-1</sup> and 995cm<sup>-1</sup> due to the Sadtler handbook of infraed spectra, and we believe that the movement to low wave number is caused by the coordination bond between phosphorus and aluminum ions (showed in Fig. S1b). According to the molecular vibration frequency equation (eq. 1), the wave number  $\sigma$  is proportional to the square root of bond force constant  $\kappa$ .

$$\sigma = \frac{\sqrt{\kappa\mu}}{2\pi c\mu} \quad (1)$$

During the synthesis process, some AlCl<sub>3</sub> molecules stick to the grown Al crystals (confirmed by the EDS analysis). Anhydrous AlCl<sub>3</sub> is a powerful Lewis acid, capable of forming Lewis acid-base adducts with even weak Lewis bases, because of the Al<sup>3+</sup> ion in the AlCl<sub>3</sub> is the electron-deficient. PPh<sub>3</sub> is a common organophosphorus compound and tends to form a coordination compound for its lone pair electrons. The P ions share the lone pair electrons with AlCl<sub>3</sub> and form a stable coordination compound. The losing of electrons make the P-C bonds force

---

\*Corresponding authors.

Email addresses: [slzhao@bjtu.edu.cn](mailto:slzhao@bjtu.edu.cn)

Tel: +86-10-51684462

Address: Institute of Optoelectronics Technology, Beijing Jiaotong University.

constant  $\kappa$  decrease, then lead to a lower wave number. This is consistent with the the FT-IR of P-C bonds at  $1079\text{cm}^{-1}$  and  $981\text{cm}^{-1}$ . What's more, the coordination compound is confirmed by the appearance of peak at  $492\text{cm}^{-1}$  in FT-IR spectrum.

So the existence of  $\text{PPh}_3$  shell is clear confirmed by the FT-IR, and these results suggest that the wet chemical process used in our study permits the production of  $\text{Al@PPh}_3$  NPs with an  $\text{PPh}_3$  layer. Since Al atoms on the surface are bound by coordination bonds with phosphor in  $\text{PPh}_3$ , the movement of nanoparticles could be arrested or slowed down. Hence, the physics of burning of  $\text{Al@PPh}_3$  NPs stabilized in the organic ligand matrices is expected to be different from free  $\text{Al@PPh}_3$  NPs. Meanwhile, the  $\text{PPh}_3$  is expected to play dual roles as to prevent aggregation of nano particles or protect it from the oxidation prior to burning because the stereo-hindrance effect caused by  $\text{PPh}_3$  molecules on the Al surface block the aggregation in nanoparticles, and lead to a small particle size and stability.

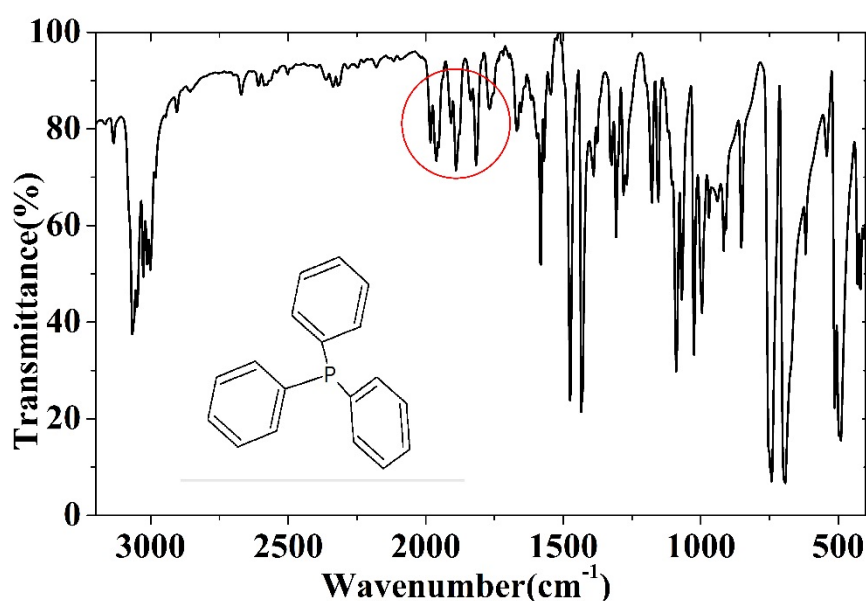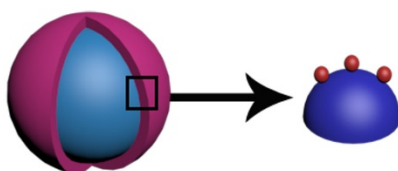

**Fig. S1.** (a) FTIR spectra of  $\text{PPh}_3$ -coated  $\text{Al@PPh}_3$  NPs. (b) Schematic illustration of the prepared  $\text{Al@PPh}_3$  NPs coated with  $\text{PPh}_3$  (purple spheres=Al and  $\text{Al}^{3+}$ , green sphere=P ions. They are connected by the covalent bond).

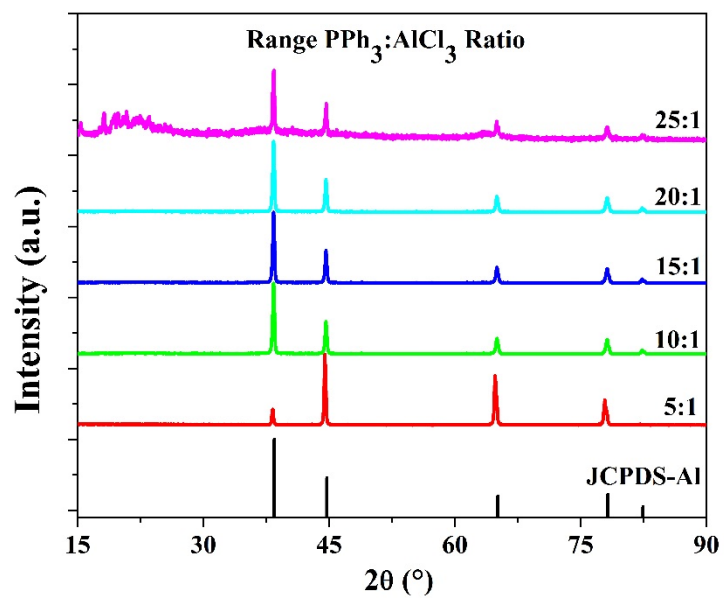

Fig. S2. XRD patterns of prepared Al@PPh<sub>3</sub> NCs in the range of PPh<sub>3</sub>:AlCl<sub>3</sub> ratios

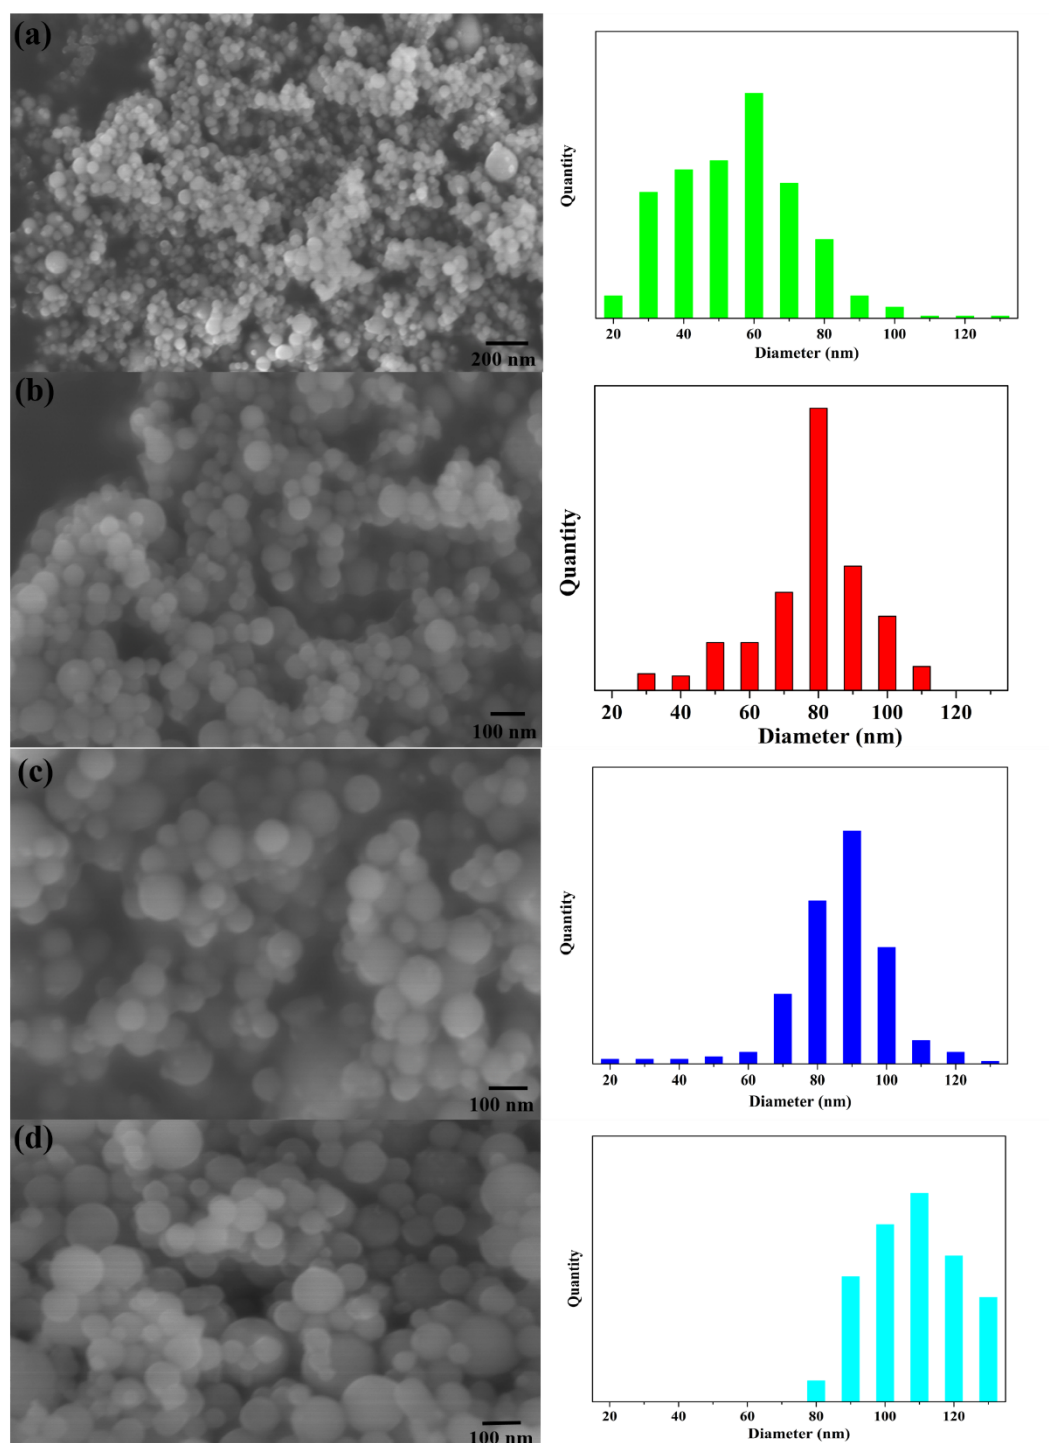

Fig. S3 SEM images and size distribution of prepared Al@ PPh<sub>3</sub> NCs in the range of PPh<sub>3</sub>:AlCl<sub>3</sub> ratios. (a) 20:1, (b) 15:1, (c) 10:1, (d) 5:1.

Fig. S2 shows XRD patterns of prepared Al@ PPh<sub>3</sub> NCs in the range of PPh<sub>3</sub>:AlCl<sub>3</sub> ratios. We find that high concentration of PPh<sub>3</sub> is bad for crystallizing of NCs, which may be due to the increase in solution viscosity at high PPh<sub>3</sub> concentrations. Higher viscosities can lead to less effective reagent mixing of raw materials. Fig. S3 shows morphology and size distribution of the core-shell nanoparticles. The increasing concentration of PPh<sub>3</sub> lead to the size decrease.

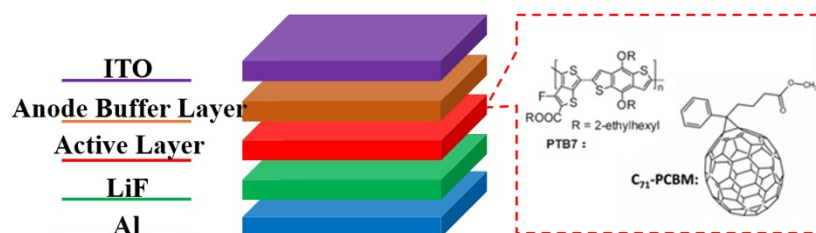

**Fig. S4.** A schematic structure of PTB7:PC<sub>71</sub>BM blend PSCs, and the chemical structures of the materials used in the active layer.

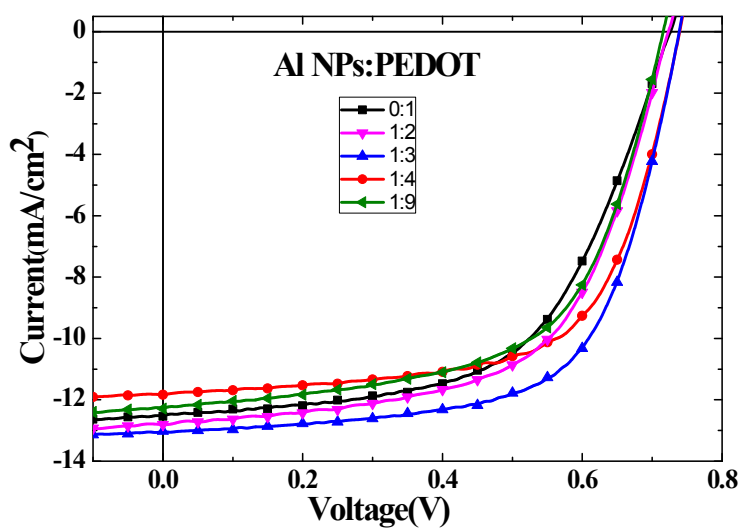

**Fig. S5.** The J-V characteristic curves of solar cells with different doping ratio of Al NPs

**Table S1** Key photovoltaic parameters of solar cells with different doping ratio of Al NPs under AM 1.5 light power of 100 mW/cm<sup>2</sup>

| Doping ratio[Al@PPh <sub>3</sub><br>NPs:PEDOT] | V <sub>oc</sub><br>[V] | J <sub>sc</sub><br>[mA/cm <sup>2</sup> ] | FF<br>[%] | PCE best<br>[%] |
|------------------------------------------------|------------------------|------------------------------------------|-----------|-----------------|
| 0:1                                            | 0.73                   | 12.53                                    | 57.5      | 5.26            |
| 1:2                                            | 0.72                   | 12.81                                    | 60.1      | 5.54            |
| 1:3                                            | 0.74                   | 13.02                                    | 65.3      | 6.29            |
| 1:4                                            | 0.74                   | 11.83                                    | 64.8      | 5.67            |
| 1:9                                            | 0.72                   | 12.29                                    | 59.97     | 5.30            |
